# Supplementary material for: A small molecule inhibitor for ATPase activity of Hsp70 and Hsc70 enhances the immune response to protein antigens
Source: PubMed Central journal article supplement (PMC4668564; doi:10.1038/srep17642), 2015-12-03
Supplement: srep17642-s1.pdf [file srep17642-s1.pdf]

## SUPPORTING INFORMATION

### **A small molecule inhibitor for ATPase activity of Hsp70 and Hsc70 enhances the immune response to protein antigens**

Kyung-Hwa Baek,<sup>1</sup> Haiying Zhang,<sup>2</sup> Bo Ryeong Lee,<sup>2</sup> Young-Guen Kwon,<sup>2</sup> Sang-Jun Ha,<sup>2,\*</sup>  
Injae Shin<sup>1,\*</sup>

<sup>1</sup>National Creative Research Initiative Center for Biofunctional Molecules, Department of Chemistry, Yonsei University, Seoul 03722, Korea

<sup>2</sup>Department of Biochemistry, College of Life Science & Biotechnology, Yonsei University, Seoul 03722, Korea

\*Corresponding authors: [injae@yonsei.ac.kr](mailto:injae@yonsei.ac.kr) (I. Shin) or [sjha@yonsei.ac.kr](mailto:sjha@yonsei.ac.kr) (S.-J. Ha)

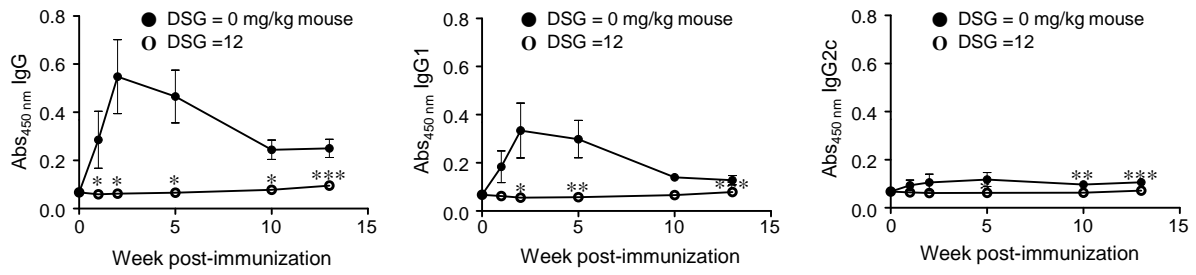

**Figure S1.** DSG suppresses the immune response to a protein antigen. C57BL/6 mice ( $n = 3-5$  per group) were *i.p.* injected with KLH ( $100 \mu\text{g}/\text{mouse}$ ). The immunized mice were *i.p.* injected with DSG ( $12 \text{ mg}/\text{kg mouse}$ ) five times daily from 0 to 4 days after prime immunization. Sera were collected at the indicated times. Production of total IgG, IgG1 and IgG2c antibodies specific to KLH was determined by using an ELISA (mean  $\pm$  s.e.m,  $n = 3-5$  mice per group). \*,  $p < 0.05$ ; \*\*,  $p < 0.01$ ; \*\*\*,  $p < 0.001$ .

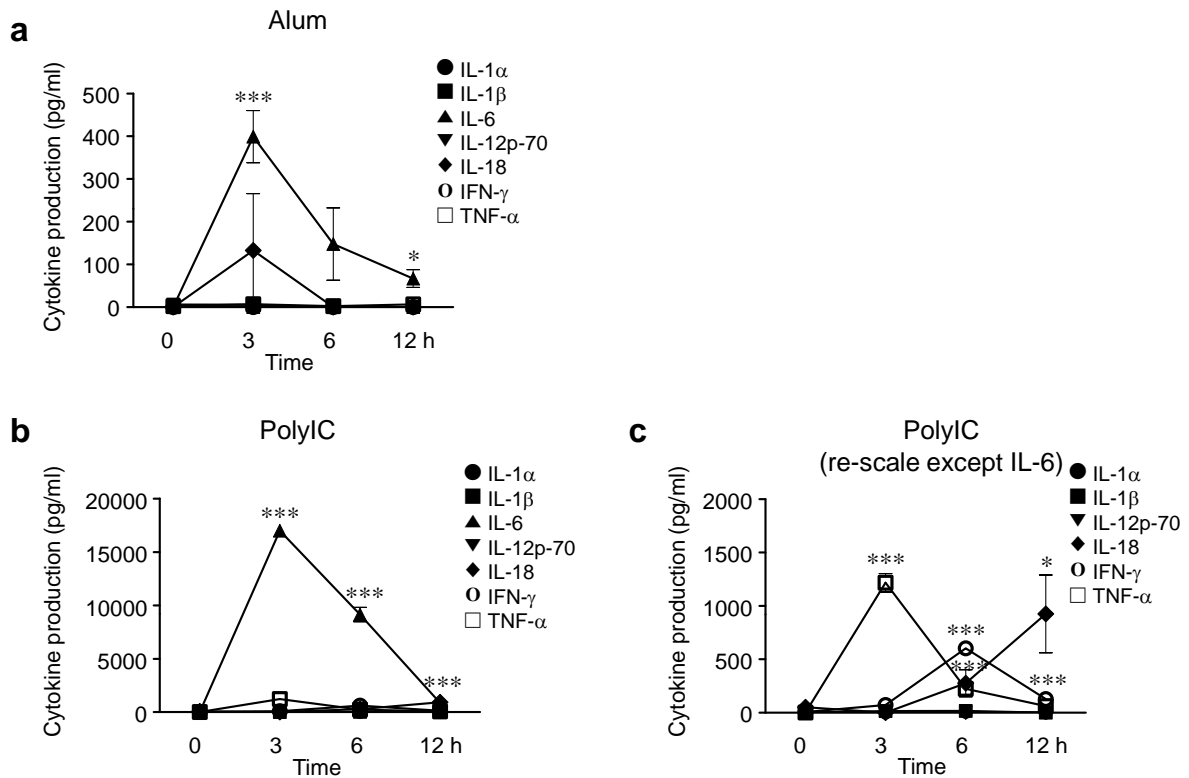

**Figure S2.** Alum and PolyI:C produce inflammatory cytokines in mice. C57BL/6 mice ( $n = 3-5$  per group) were *i.p.* injected with (a) Alum (33.0 mg/kg mouse) and (b) PolyI:C (6.65 mg/kg mouse), and sera were collected at the indicated times. The amounts of cytokines were determined by using a multiple cytokine assay. (c) Re-scaled graph of graph (b). All graphs are shown as mean  $\pm$  s.e.m. \*,  $p < 0.05$ ; \*\*,  $p < 0.01$ ; \*\*\*,  $p < 0.001$ .

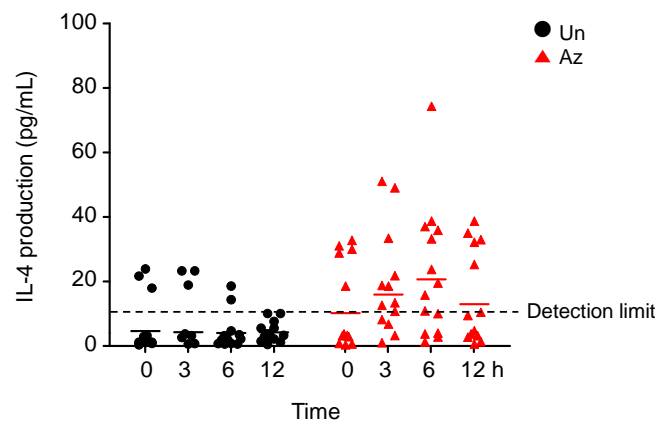

**Figure S3.** Az slightly increases IL-4 production in mice. C57BL/6 mice ( $n = 15$  per group) were *i.p.* injected with Az (2.25 mg/kg mouse) and sera were collected at the indicated times. The amount of IL-4 was determined by using an ELISA assay (mean  $\pm$  s.e.m).
